# Supplementary material
Source: Research Square preprint supplement (doi:10.21203/rs.3.rs-8992119/v1)
Supplement: Supplementary file 1 [file 385362bf18042f6941346d4e.xlsx]

## Sheet: Sheet1
Supplementary Table 2. Detailed performance comparison of ProTSC-TCR and baselines on the 35-target benchmark for CDR3α design. This table lists quantitative evaluation results for each of the 35 test targets under the Best-of-10 protocol. The "Mean" row summarizes the average performance across all targets. The best baseline performance for each metric is underlined and italicized. The "R.I. (%)…
	RMSD (Å)							AAR (%)					ΔΔG (REU)
PDB ID	ProteinMPNN+ AlphaFold3	ProteinMPNN+tFold-TCR	ESM-IF+ AlphaFold3	ESM-IF+ tFold-TCR	DiffAb	FlowDesign	ProTSC-TCR	ProteinMPNN	ESM-IF	DiffAb	FlowDesign	ProTSC-TCR	ProteinMPNN+AlphaFold3	ProteinMPNN+tFold-TCR	ESM-IF+ AlphaFold3	ESM-IF+ tFold-TCR	DiffAb	FlowDesign	ProTSC-TCR
6zkw	1.6474	2.3676	5.265	3.9092	2.097	1.8626	1.9591	61.5385	23.0769	23.0769	46.1538	46.1538	-3.52541	-4.94148	-2.84084	-3.902	-16.1806	-32.5616	-17.2113
7dzm	0.86	0.9307	11.2165	10.2739	3.209	1.9228	1.7989	53.3333	20	26.6667	62.5	62.5	-10.7699	-4.36557	-9.73203	-6.52546	8.2861	-7.4206	-3.0313
7l1d	6.8909	6.8727	7.4184	7.2803	4.0598	3.2378	2.1212	53.8462	38.4615	38.4615	46.1538	57.1429	-19.243	4.29097	-9.07587	9.89484	-27.8674	5.385	-2.6018
7n2n	2.5492	2.6519	4.0783	5.4657	1.9178	2.4057	1.9881	35.2941	23.5294	41.1765	30	41.1765	-2.45021	-5.98879	-6.30896	-4.66043	-19.131	-18.941	-0.9921
7n2o	3.0798	3.1554	3.7539	3.6199	1.7569	2.3437	2.1543	35.2941	29.4118	41.1765	29.4118	41.1765	-13.4698	-28.66	-9.05471	14.5822	0.3165	-37.2045	-6.9248
7n2p	1.9434	2.1626	2.0661	2.0024	0.8445	1.0904	1.5203	54.5455	9.09091	36.3636	36.3636	54.5455	-10.2603	0.974367	-11.4726	12.7877	2.7576	3.3581	-8.6273
7n2q	1.2923	1.3652	2.1132	2.2439	1.1805	1.2859	2.0505	45.4545	9.09091	36.3636	36.3636	54.5455	-14.8521	12.2986	-3.12548	7.16669	-14.6128	-6.6157	-15.1542
7n2r	3.1649	3.4287	2.4495	2.8135	1.1613	1.393	1.1655	54.5455	9.09091	36.3636	36.3636	54.5455	-6.59892	9.8855	-12.0519	22.3527	-10.1216	7.0522	8.8965
7n2s	4.5447	5.2317	11.3817	11.4894	1.9136	1.5687	1.7851	43.75	43.75	35.2941	37.5	64.7059	-15.7426	-9.68556	-4.94951	4.1427	3.0231	-15.4677	-13.5985
7na5	2.4558	4.5023	4.9316	5.2259	1.2154	1.4316	0.9821	81.8182	9.09091	36.3636	36.3636	63.6364	-12.4164	12.321	-7.33929	-20.396	-15.0695	-2.2767	2.1537
7ndq	2.0869	2.7023	7.0276	5.7124	3.6151	3.4323	2.6506	40	6.66667	26.6667	33.3333	60	-8.41524	-1.88516	-2.50449	-18.0363	6.0856	-43.5825	-16.8193
7nme	0.9281	0.89	4.85	5.1751	2.5488	2.3443	1.8086	53.8462	23.0769	38.4615	30.7692	61.5385	-1.02043	-8.88484	-3.94379	-1.61245	-7.81	-14.2782	-21.9412
7nmg	1.2902	0.8965	4.857	5.1751	2.9477	1.8343	1.3432	61.5385	23.0769	38.4615	30.7692	64.2857	-8.88484	-1.61245	-1.02043	-3.94379	19.7221	-56.1827	-37.7499
7ow5	1.133	1.0291	4.2497	4.1569	2.9223	2.5799	1.5656	50	25	43.75	33.3333	50	-8.73456	-13.6691	10.9858	-11.4064	-9.2794	-8.3576	-38.7345
7ow6	0.8286	0.9183	3.7189	4.3098	2.2176	2.8259	3.3541	43.75	25	37.5	33.3333	50	6.98512	-1.76573	14.4688	10.8857	-11.7613	7.6494	-2.0954
7pbc	0.6909	0.6903	5.2125	4.2318	2.3583	1.8241	1.7667	61.5385	30.7692	35.7143	38.4615	61.5385	7.56791	1.29867	12.3055	16.5804	-17.3441	-12.0906	-5.082
7pbe	1.0568	0.9981	1.5099	4.2058	2.019	1.4471	1.5881	41.6667	16.6667	25	25	58.3333	1.2571	-4.65918	-17.2927	-8.91659	-7.786	-11.9573	-14.3736
7pdw	0.673	0.6898	4.2926	4.4001	1.8155	1.824	1.159	53.8462	38.4615	35.7143	38.4615	61.5385	-7.37293	5.05676	-4.74229	-2.2125	-15.7749	-11.7234	-10.7972
7phr	0.9792	0.901	2.7486	2.7867	1.428	2.0074	1.4236	63.6364	18.1818	45.4545	45.4545	54.5455	-11.9023	0.353116	68.0015	-8.23772	-4.1704	-0.6449	-6.372
7q99	1.0865	0.9843	3.2237	3.7941	1.433	1.5146	1.365	54.5455	18.1818	36.3636	27.2727	54.5455	-10.8257	23.492	7.66538	20.1508	-2.0126	-14.4554	-18.0323
7q9a	1.1489	1.2219	3.6379	3.935	2.0172	2.081	1.6078	72.7273	25	37.5	25	50	-20.7622	9.89901	-4.60112	-4.62946	8.9299	-1.9165	-3.7085
7q9b	3.6299	3.5376	16.3309	3.2985	1.8021	1.3091	1.7591	50	18.1818	30.7692	46.6667	61.5385	-5.48441	-0.98778	-24.2945	24.2522	-2.5271	4.4408	-12.8664
7qpj	0.8775	0.4952	4.1158	2.5566	1.9179	2.2241	1.6943	61.5385	38.4615	30.7692	30.7692	57.1429	-0.275249	12.5537	-10.4523	-4.4727	17.9315	-16.5519	-10.0433
7r80	1.4947	1.6291	2.4306	2.9402	2.2302	2.1073	0.8867	38.4615	23.0769	30.7692	38.4615	61.5385	6.40867	20.078	-1.33193	-4.97629	-15.1427	10.6143	-5.879
7rrg	2.2732	2.1886	6.3427	4.9343	3.5077	3.3259	2.7945	60	15.3846	20	22.2222	47.0588	6.94889	-9.68214	-3.59271	7.98887	12.432	-15.3094	-4.847
7rdv	10.42	7.7893	12.2185	12.0145	2.1443	2.6113	1.237	38.4615	40	43.75	53.3333	71.4286	4.29213	-1.82495	3.28464	17.4764	6.6964	-31.3511	-26.4946
7sg0	1.0688	1.0675	7.0027	5.8179	2.6885	3.0231	2.0724	42.8571	21.4286	25	33.3333	41.6667	0.959705	-2.42538	-4.20934	8.54994	-31.1636	13.2381	7.5405
7sg1	2.137	3.1051	4.7158	3.6062	1.8645	3.9454	2.163	41.6667	33.3333	26.6667	31.5789	53.3333	-2.86732	0.679701	20.8167	-7.7766	-7.5854	-6.3253	-19.46
7t2b	2.4478	3.3305	6.7507	6.8246	2.8539	3.2745	1.2527	33.3333	20	38.4615	38.4615	69.2308	1.31668	5.06379	-12.9727	16.4486	-7.1982	17.4157	7.2279
7t2c	5.4672	5.3068	7.9304	8.0899	1.6586	2.2627	1.3633	38.4615	15.3846	25	25	58.3333	10.7429	-1.73359	-6.18777	-2.17534	17.3713	11.7932	-36.6853
8cx4	2.9202	2.8555	5.8685	5.9093	2.6821	3.0439	2.8203	35.2941	8.33333	47.0588	38.8889	64.7059	-1.76855	-0.349987	0.919506	10.3424	-9.0598	-3.5356	-14.6691
8d5q	1.3766	1.4025	1.6499	27.4142	2.9513	3.1241	2.5398	56.25	41.1765	43.75	37.5	56.25	-20.8852	-1.85621	1.26707	12.2561	-2.0757	-4.6143	-8.8226
8dnt	12.0686	22.1745	2.8427	3.0196	0.8884	2.2454	1.6226	83.3333	25	33.3333	33.3333	58.3333	-12.0769	-1.49892	-24.07	-4.24265	-81.7563	-16.8541	-22.4055
8gvb	1.8615	1.7683	4.2482	4.0756	1.4776	1.7344	1.2607	57.1429	25	37.5	42.8571	64.2857	-4.4404	19.5128	-2.3996	10.337	16.1868	-83.1636	-19.1456
8shi	5.2906	4.3656	5.3953	4.0629	3.3247	2.6511	2.6699	47.0588	17.6471	37.5	41.1765	52.9412	4.8	8.24991	4.21	2.64	16.548	16.5679	-3.76128
Mean	2.67612	3.01733	5.36701	5.62203	2.19057	2.26113	1.80839	51.4393	23.0595	34.9206	36.3413	56.6926	-5.25044	1.12946	-1.58977	3.16321	-5.68981	-10.7391	-11.5174
R. I. (%)	\	\	\	\	\	\	17.4467	\	\	\	\	10.2127	\	\	\	\	\	\	7.24744
