# Supplementary material
Source: Research Square preprint supplement (doi:10.21203/rs.3.rs-8992119/v1)
Supplement: Supplementary file 2 [file b91494ca5ca0d6d949d8be60.xlsx]

## Sheet: Sheet1
Supplementary Table 1. Detailed performance comparison of ProTSC-TCR and baselines on the 35-target benchmark for CDR3β design. This table lists quantitative evaluation results for each of the 35 test targets under the Best-of-10 protocol. The "Mean" row summarizes the average performance across all targets. The best baseline performance for each metric is underlined and italicized. The "R.I. (%)…
	RMSD (Å)							AAR (%)					ΔΔG (REU)
PDB ID	ProteinMPNN+ AlphaFold3	ProteinMPNN+ tFold-TCR	ESM-IF+ AlphaFold3	ESM-IF+ tFold-TCR	DiffAb	FlowDesign	ProTSC-TCR	ProteinMPNN	ESM-IF	DiffAb	FlowDesign	ProTSC-TCR	ProteinMPNN+ AlphaFold3	ProteinMPNN+ tFold-TCR	ESM-IF+ AlphaFold3	ESM-IF+ tFold-TCR	DiffAb	FlowDesign	ProTSC-TCR
6zkw	1.6342	6.7945	8.2452	5.0277	3.4453	3.8261	1.7618	37.5	37.5	19.0476	43.75	62.5	-3.4005	17.958	-29.4389	4.8028	-16.1806	-2.7571	5.6102
7dzm	3.6035	2.115	2.1089	4.8784	1.5217	1.9208	0.963	54.17	58.3333	41.6667	50	58.3333	-13.9171	3.0702	-31.6985	19.1507	8.2861	4.86768	-11.3568
7l1d	6.3636	4.9975	13.7905	10.3059	4.6169	8.0271	6.0096	62.5	26.3158	21.0526	31.25	52.6316	-0.1359	-6.8057	-23.4186	-13.4159	-27.8674	4.78028	-25.4827
7n2n	5.9245	3.0685	11.6391	4.1213	2.6303	4.0008	1.2694	62.5	26.6667	33.3333	56.25	66.6667	-4.1404	27.9001	-21.2912	-2.8164	-19.131	-33.4737	-18.2904
7n2o	5.4903	2.5512	8.2241	7.9445	2.437	3.5974	1.0263	58.33	20	35	56.25	60	-6.5509	38.3663	-18.1373	-15.1608	0.3165	2.9543	-24.0906
7n2p	4.7455	2.0126	7.2929	11.4127	2.6805	3.4726	0.9948	41.67	33.3333	33.3333	43.75	53.3333	-11.1455	-20	-4.6697	-21.9721	2.7576	-5.17327	-9.0343
7n2q	10.0065	2.2748	7.6482	2.5078	2.9879	3.4325	1.1121	41.67	20	36.8421	43.75	53.3333	-19.717	10.6279	-0.8175	-10.2023	-14.6128	-8.94504	-2.3025
7n2r	4.8496	2.9607	5.9625	1.4684	2.3826	3.615	0.8838	41.67	40	36.8421	43.75	53.3333	-1.3569	62.1274	-16.784	5.7947	-10.1216	-11.1261	-10.5963
7n2s	8.0861	3.4141	7.7709	1.6814	2.4009	3.2165	0.7478	54.17	13.3333	33.3333	56.25	66.6667	-13.781	-22.5652	7.5254	-5.3394	3.0231	6.91528	6.2562
7na5	11.4273	2.76	4.1477	9.4079	3.242	4.0097	0.9692	62.5	46.6667	33.3333	50	60	17.8105	25.6853	-16.881	-21.8776	-15.0695	-7.42828	-3.8812
7ndq	2.3451	3.8001	6.786	3.3704	3.1825	3.67	1.8168	54.17	0	31.25	56.25	61.5385	-16.4476	40.7186	29.5699	-15.8198	6.0856	-18.9021	-6.6607
7nme	1.536	1.1125	1.5351	1.4684	1.9304	1.6403	0.6284	72.7273	45.45	42.8571	42.8571	81.8182	-14.82	6.97	-10.0118	10.4621	-8.4454	-27.9022	-20.0839
7nmg	1.5748	1.0117	9.343	1.5829	2.3608	1.6403	0.8463	37.5	63.6364	36.3636	56.25	43.75	-3.8171	25.6956	-9.7467	11.7151	19.7221	-0.002436	-8.3585
7ow5	9.3722	3.6015	3.9352	1.0591	2.6377	3.6852	2.286	58.33	18.75	31.5789	43.75	43.75	-38.2391	10.756	8.7704	6.1507	-9.2794	-20.7292	-10.2795
7ow6	3.1487	2.6825	11.1338	5.5802	2.9493	3.8855	2.277	58.33	25	25	43.75	81.8182	-17.7898	18.9345	-9.0817	-5.2867	-11.7613	-12.4503	-6.7079
7pbc	1.5692	2.1605	7.8553	6.2771	2.3909	2.0256	0.9584	54.17	27.2727	45.4545	43.75	76.9231	22.2091	8.0741	-0.7528	11.8505	-17.3441	3.71905	-15.9677
7pbe	1.6416	1.4524	5.5264	3.9182	2.551	2.2207	1.3472	62.5	38.4615	30.7692	68.75	72.7273	8.7088	46.2843	-9.819	-19.1381	-7.786	8.51041	-8.2618
7pdw	1.0811	1.8096	6.4704	1.7126	2.1259	2.0007	0.9301	37.5	27.2727	45.4545	43.75	78.5714	7.0917	42.5595	29.5615	2.3525	-15.7749	-8.59724	-16.36
7phr	5.9319	1.3545	1.6627	8.6723	2.2575	2.745	1.3577	37.5	61.5385	23.0769	43.75	66.6667	-2.9825	27.4662	19.5412	-22.8762	-4.1704	-12.1508	-13.4221
7q99	7.1819	2.3908	3.6663	5.0253	2.1127	5.0139	2.043	66.67	33.3333	31.25	37.5	62.5	-13.8076	9.4722	13.8944	-17.5013	-2.0126	-0.638565	-10.2606
7q9a	3.1731	2.3275	3.1984	2.7926	3.8936	6.384	1.6687	62.5	20	35.2941	25	63.6364	-8.5075	18.7001	-18.2362	-12.8562	8.9299	8.3379	-11.3596
7q9b	6.3806	13.5856	5.6887	7.8591	1.9243	1.8383	1.091	54.17	50	36.3636	31.25	53.3333	-13.4236	32.1034	-9.5072	2.2812	-2.5271	-19.0814	-5.1141
7qpj	1.8502	1.5948	3.8275	1.8811	2.5784	2.5996	0.901	58.33	18.1818	31.25	62.5	69.2308	-13.9887	17.8495	-23.4559	14.0368	17.9315	-171.568	-42.0594
7r80	8.4263	4.1138	6.3203	2.0932	3.123	3.6932	1.3354	54.17	26.6667	38.4615	43.75	64.2857	2.4007	64.309	-21.7964	-3.4068	-15.1427	9.09701	5.7467
7rrg	4.0906	3.295	9.77	3.5188	3.3239	3.2991	0.9714	50	35.7143	35.7143	50	69.2308	-8.881	35.3142	-14.2136	-12.698	12.432	2.97982	-11.0508
7rdv	1.9134	3.1135	4.6697	6.8124	2.3508	3.0745	0.9184	54.17	61.5385	30.7692	43.75	50	-10.4331	-2.8486	-11.2773	-0.4747	6.6964	-14.7965	-2.7459
7sg0	2.1508	2.5865	5.4042	2.2214	2.8866	3.5187	1.8983	37.5	46.1538	40	37.5	75	-27.6556	7.9208	-1.259	-25.2287	-31.1636	-36.7667	-30.5442
7sg1	2.2945	1.663	12.3612	5.882	2.8567	2.3389	1.5506	58.33	35.7143	50	62.5	58.8235	3.6524	6.6668	-31.3901	-5.4325	-7.5854	-0.227369	-13.2935
7t2b	2.0551	2.7916	11.5521	3.1044	4.0697	5.4574	3.4726	54.17	33.3333	40	50	76.9231	-19.8447	30.4466	18.2201	-5.1102	-7.1982	-19.3389	-11.3656
7t2c	2.8732	3.5188	4.882	5.4402	2.5859	2.2592	1.1283	50	23.5294	30.7692	43.75	53.3333	7.089	-1.5136	5.1104	-19.442	17.3713	10.1859	-86.2092
8cx4	4.4007	2.9412	5.1144	3.9921	2.3112	3.0375	0.6988	41.67	13.3333	35.2941	56.25	46.6667	5.0519	19.6493	-8.442	2.3305	-9.0598	1.55532	5.9115
8d5q	7.5954	1.9923	8.9932	4.1155	3.121	3.7887	1.5935	45.83	26.6667	27.7778	56.25	71.4286	-3.6006	8.369	22.1055	-4.8821	-2.0757	-9.00361	-53.4706
8dnt	1.6951	2.1506	2.3301	2.5501	3.0425	3.0865	1.5122	41.67	14.2857	33.3333	43.75	60	-14.3305	21.5501	12.3302	-12.5504	-81.7563	-24.0919	-54.1824
8gvb	1.9738	4.1102	3.1045	6.2201	2.3102	4.267	1.6035	45.83	40	29.4118	37.5	81.8181	-9.8821	32.8842	15.8821	-3.1102	16.1868	-13.7392	-1.4567
8shi	3.6988	3.6	4.4328	3.5188	3.3146	3.4945	1.3	50	21.43	31.25	42.8571	57.1428	13.52	13.92	15.21	14.24	0.1393	7.48942	-26.8887
Mean	4.34529	3.07741	6.46838	4.55498	2.75818	3.42237	1.48207	51.8405	32.2689	34.0722	46.9133	63.0776	-6.43035	19.389	-4.12586	-4.89802	-6.17679	-11.6428	-15.6461
R. I. (%)	\	\	\	\	\	\	46.2664	\	\	\	\	21.6762	\	\	\	\	\	\	34.3844
